# Supplementary material for: Amitriptyline’s anticholinergic adverse drug reactions–A systematic multiple-indication review and meta-analysis
Source: PubMed Central journal article supplement (PMC10075391; doi:10.1371/journal.pone.0284168), 2023-04-05
Supplement: pone.0284168.s003.pdf [file pone.0284168.s003.pdf]

**S3 Table: Nesting of Outcomes**

| Primary outcomes                                        | Secondary outcomes                                          |                                                                                                                                                                                                                                                                                    |
|---------------------------------------------------------|-------------------------------------------------------------|------------------------------------------------------------------------------------------------------------------------------------------------------------------------------------------------------------------------------------------------------------------------------------|
|                                                         | Aggregated ADRs*                                            | Individual ADR*                                                                                                                                                                                                                                                                    |
| ADRs indicative of anti-cholinergic activity (ACH-ADRs) | Dry mouth-related ADRs (15)                                 | <b>Dry mouth</b> (14)<br><b>Dry mucous membrane</b> (1)                                                                                                                                                                                                                            |
|                                                         | Digestion-related ADRs (13)                                 | Constipation (13)                                                                                                                                                                                                                                                                  |
|                                                         | Genitourinary-related ADRs (5)                              | Urinary retention (2)<br>Difficulty urinating (1)<br>Micturition disorder (1)<br>Urogenital (1)                                                                                                                                                                                    |
|                                                         | Vision-related ADRs (8)                                     | Blurred vision (4)<br>Amblyopia (2)<br>Vision abnormalities (2)                                                                                                                                                                                                                    |
|                                                         | Thermoregulation-related ADRs (1)                           | Sweat discoloration (1)                                                                                                                                                                                                                                                            |
|                                                         | Cardiovascular-related ADRs (7)                             | Tachycardia (3)<br>Palpitation (3)<br>Postural Hypotension (1)<br>Standing heartrate (1)<br>Supine heartrate (1)<br>Increased standing and supine pulse (2)                                                                                                                        |
|                                                         | Fatigue-related ADRs (20)                                   | <b>Fatigue</b> (6)<br>Asthenia (2)<br><b>Drowsiness</b> (8)<br>Dizziness (19)<br>Depression (2)<br><b>Somnolence</b> (8)<br><b>Sedation</b> (4)<br>Sedative effects (drowsiness, sedation, excessive sleep) (1)<br><b>Constitutional symptoms (primarily fatigue, malaise)</b> (1) |
|                                                         | Attention-related ADRs (1)                                  | Confusion (1)                                                                                                                                                                                                                                                                      |
|                                                         | Memory-related ADRs (1)                                     | Amnesia (1)                                                                                                                                                                                                                                                                        |
|                                                         | Restlessness-related ADRs (13)                              | Restlessness (1)<br>Agitation (3)<br>Nervousness (3)<br>Tingling (1)<br>Sensory system (1)<br>Anxiety (1)<br>Panic attack (1)<br>Insomnia (11)                                                                                                                                     |
|                                                         | Coordination-related ADRs (8)                               | Tremor (8)<br>Hyperkinesia (1)<br>Hypokinesia (1)<br>Slurred speech (1)<br>Paresthesia (1)                                                                                                                                                                                         |
|                                                         | Unspecifically reported ACH-ADRs (1)                        | <b>Anticholinergic effects (dry mouth, constipation, visual disturbances)</b> (1)                                                                                                                                                                                                  |
|                                                         | ADRs not indicative of anticholinergic activity (NACH-ADRs) | <b>Nausea</b> (6)<br>Vomiting (1)<br><b>Dyspepsia</b> (4)<br>Bloating (1)<br>Diarrhea (3)<br>Hemorrhoids (1)<br>Intestinal fluid (1)<br>Metabolic nutritional (1)                                                                                                                  |

|                                               |                                                                                                                                                                                                                                                                                                                                                                                                                                                                            |
|-----------------------------------------------|----------------------------------------------------------------------------------------------------------------------------------------------------------------------------------------------------------------------------------------------------------------------------------------------------------------------------------------------------------------------------------------------------------------------------------------------------------------------------|
|                                               | Anorexia (1)<br>Abdominal pain (2)<br><b>Epigastralgia</b> (1)<br>Taste perversion (1)                                                                                                                                                                                                                                                                                                                                                                                     |
| <i>ADRs related to hypersensitivity</i> (6)   | Pruritus (2)<br>Rash (2)<br><b>Allergic</b> (1)<br>Liver function abnormality (1)                                                                                                                                                                                                                                                                                                                                                                                          |
| ADRs related to the endocrine system (3)      | Impotence (1)<br><b>Sexual</b> (2)<br>Change in appetite (1)<br><b>Increased appetite</b> (3)                                                                                                                                                                                                                                                                                                                                                                              |
| <i>Unspecifically reported NACH-ADRs</i> (12) | Reduced appetite (1)<br>Sweat (3)<br><i>Weight gain</i> (5)<br><b>Headache</b> (9)                                                                                                                                                                                                                                                                                                                                                                                         |
| <i>General unspecific ADRs (G-ADRs)</i>       | <i>Unspecifically reported G-ADRs</i> (5)                                                                                                                                                                                                                                                                                                                                                                                                                                  |
|                                               | <b>Chest pain</b> (2)<br>Heartburn (1)<br>Infection/fever (1)<br>Musculoskeletal (2)<br><b>Nasal congestion</b> (1)<br>Otolaryngologic (1)<br>Pain (primarily headache) (1)<br>Respiratory (1)<br>Pulmonary (2)<br>Endocrine (1)<br>Hematologic (1)<br>Clostridium difficile infection (1)<br><b>Neurological</b> (2)<br>Psychiatric (1)<br>Cardiovascular (1)<br>Dermatology/skin (2)<br>Renal/genitourinary (1)<br>Gynecologic (1)<br>Gastrointestinal (2)<br>Dreams (1) |
|                                               | <b>ADRs overall</b><br>(No specific ADRs reported) (11)                                                                                                                                                                                                                                                                                                                                                                                                                    |
|                                               | <b>Discontinued due to ADRs</b><br>(No specific ADRs reported) (13)                                                                                                                                                                                                                                                                                                                                                                                                        |

bold = ADR included in primary outcome; italic = meta-analysis conducted (at least 5 studies); \* = in brackets: number of included studies.
