# Supplementary material for: Amitriptyline’s anticholinergic adverse drug reactions–A systematic multiple-indication review and meta-analysis
Source: PubMed Central journal article supplement (PMC10075391; doi:10.1371/journal.pone.0284168), 2023-04-05
Supplement: pone.0284168.s004.pdf [file pone.0284168.s004.pdf]

**S4 Table: RoB Traffic Light Plot**

| Study            | Risk of bias domains |    |    |    |    | Overall |
|------------------|----------------------|----|----|----|----|---------|
|                  | D1                   | D2 | D3 | D4 | D5 |         |
| amsterdam_1986   | -                    | +  | +  | ⊗  | +  | ⊗       |
| bakish_1992a     | -                    | +  | -  | ⊗  | +  | ⊗       |
| bremner_1995     | -                    | -  | -  | +  | +  | ⊗       |
| carette_1994     | +                    | -  | -  | +  | +  | -       |
| carman_1991      | -                    | +  | +  | +  | +  | -       |
| claghorn_1983b   | -                    | +  | +  | ⊗  | +  | ⊗       |
| couch_2010       | +                    | +  | +  | ⊗  | +  | ⊗       |
| dinat_2015       | +                    | +  | +  | +  | +  | +       |
| feighner_1979    | -                    | +  | +  | +  | +  | -       |
| foster_2010      | -                    | +  | +  | ⊗  | +  | ⊗       |
| goldberg_1980    | +                    | +  | +  | ⊗  | +  | ⊗       |
| goldman_2010     | +                    | +  | +  | +  | +  | +       |
| goncalves_2016   | -                    | +  | +  | ⊗  | +  | ⊗       |
| kautio_2009      | -                    | +  | +  | ⊗  | +  | ⊗       |
| lydiard_1997     | -                    | -  | -  | +  | +  | ⊗       |
| maarrawi_2018    | +                    | +  | +  | ⊗  | +  | ⊗       |
| montgomery_1998  | -                    | +  | +  | ⊗  | +  | ⊗       |
| pfaffenrath_1993 | -                    | +  | +  | +  | +  | -       |
| reimherr_1990    | -                    | +  | +  | ⊗  | +  | ⊗       |
| rickels_1970     | -                    | -  | -  | +  | +  | ⊗       |
| rickels_1982     | -                    | +  | +  | ⊗  | +  | ⊗       |
| roffman_1982     | -                    | +  | +  | ⊗  | +  | ⊗       |
| talley_2015      | +                    | +  | +  | ⊗  | +  | ⊗       |

Domains:  
D1: Bias due to randomisation.  
D2: Bias due to deviations from intended intervention.  
D3: Bias due to missing data.  
D4: Bias due to outcome measurement.  
D5: Bias due to selection of reported result.

Judgement  
⊗ High  
- Some concerns  
+ Low
