# Supplementary material for: Amitriptyline’s anticholinergic adverse drug reactions–A systematic multiple-indication review and meta-analysis
Source: PubMed Central journal article supplement (PMC10075391; doi:10.1371/journal.pone.0284168), 2023-04-05

**S5 Table: RoB Summary Plot**

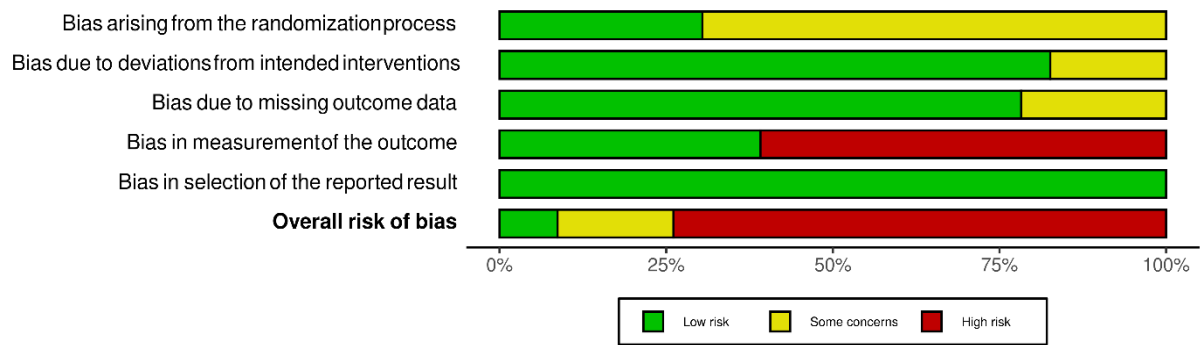

Supplement: pone.0284168.s005.pdf [file pone.0284168.s005.pdf]
