# Supplementary material for: Amitriptyline’s anticholinergic adverse drug reactions–A systematic multiple-indication review and meta-analysis
Source: PubMed Central journal article supplement (PMC10075391; doi:10.1371/journal.pone.0284168), 2023-04-05
Supplement: pone.0284168.s006.pdf [file pone.0284168.s006.pdf]

**S6 Table: Sensitivity Analyses of Primary Outcomes**

| Sensitivity Analysis | n <sub>studies</sub> | N <sub>AMI</sub> | N <sub>PLA</sub> | OR   | 95% CI        | I <sup>2</sup> | τ <sup>2</sup> | Favors* |
|----------------------|----------------------|------------------|------------------|------|---------------|----------------|----------------|---------|
| <b>ACH-ADRs</b>      |                      |                  |                  |      |               |                |                |         |
| Low or medium RoB    | 5                    | 318              | 278              | 4.70 | (1.29; 17.17) | 80%            | .87            | PLA     |
| Subjective outcome   | 8                    | 561              | 505              | 4.05 | (2.26; 7.26)  | 58%            | .29            | PLA     |
| <b>NACH-ADRs</b>     |                      |                  |                  |      |               |                |                |         |
| Subjective outcome   | 5                    | 387              | 341              | 1.62 | (0.74; 3.52)  | 0%             | <.01           | INC     |
| <b>G-ADRs</b>        |                      |                  |                  |      |               |                |                |         |
| Low or medium RoB    | 6                    | 402              | 320              | 3.66 | (1.75; 7.65)  | 36%            | .10            | PLA     |
| Subjective outcome   | 6                    | 445              | 397              | 4.54 | (2.44; 8.46)  | 26%            | .04            | PLA     |

AMI = amitriptyline; PLA = placebo; OR = odds ratio; CI = confidence interval; I<sup>2</sup> = heterogeneity; τ<sup>2</sup> = between-study variance; RoB = risk of bias; ACH-ADRs = ADRs indicative of anticholinergic activity; NACH-ADRs = ADRs not indicative of anticholinergic activity; G-ADRs = general, unspecific ADRs.

\*PLA = more frequent ADRs in amitriptyline group (95% CI not including "1"); AMI = more frequent ADRs in placebo group (95% CI not including "1"); INC: inconclusive, i.e., no difference in frequency of ADRs between placebo and amitriptyline groups (95% CI includes "1").
