# Supplementary material for: Amitriptyline’s anticholinergic adverse drug reactions–A systematic multiple-indication review and meta-analysis
Source: PubMed Central journal article supplement (PMC10075391; doi:10.1371/journal.pone.0284168), 2023-04-05
Supplement: pone.0284168.s007.pdf [file pone.0284168.s007.pdf]

**S7 Table: Subgroup Analyses of Primary Outcomes**

| Subgroup Analysis             | n <sub>studies</sub> | N <sub>AMI</sub> | N <sub>PLA</sub> | OR          | 95% CI*              | I <sup>2</sup> | τ <sup>2</sup> | Favors**   |
|-------------------------------|----------------------|------------------|------------------|-------------|----------------------|----------------|----------------|------------|
| <b>ACH-ADRs</b>               | <b>20</b>            | <b>1799</b>      | <b>1711</b>      | <b>7.41</b> | <b>(4.54; 12.12)</b> | <b>83%</b>     | <b>0.84</b>    | <b>PLA</b> |
| <b>Gender</b>                 |                      |                  |                  |             |                      |                |                |            |
| Female                        | 3                    | 221              | 215              | 17.14       | (0.41; 719.77)       | 81%            | 1.80           | INC        |
| Male                          | 15                   | 1397             | 1317             | 5.95        | (3.44; 10.29)        | 83%            | 0.80           | PLA        |
| Unknown                       | 2                    | 181              | 179              | 10.81       | (0.05; 2488.17)      | 51%            | 0.84           | INC        |
| <b>Indication</b>             |                      |                  |                  |             |                      |                |                |            |
| Depression                    | 11                   | 911              | 835              | 11.59       | (5.93; 22.64)        | 75%            | 0.67           | PLA        |
| Other                         | 9                    | 888              | 876              | 3.58        | (2.03; 6.32)         | 64%            | 0.34           | PLA        |
| <b>Mode of administration</b> |                      |                  |                  |             |                      |                |                |            |
| Capsules                      | 11                   | 794              | 745              | 11.04       | (5.50; 22.18)        | 74%            | 0.74           | PLA        |
| Tablets                       | 5                    | 565              | 524              | 4.11        | (1.39; 12.14)        | 73%            | 0.57           | PLA        |
| Others                        | 2                    | 232              | 233              | 2.03        | (0.16; 25.57)        | 0%             | 0              | INC        |
| Unknown                       | 2                    | 208              | 209              | 3.70        | (0.01; 1.69e+04)     | 77%            | 0.54           | INC        |
| <b>Mean daily dose</b>        |                      |                  |                  |             |                      |                |                |            |
| <100mg                        | 10                   | 974              | 933              | 4.59        | (2.41; 8.75)         | 76%            | 0.62           | PLA        |
| >=100mg & <=150mg             | 7                    | 627              | 622              | 16.04       | (6.55; 39.27)        | 74%            | 0.62           | PLA        |
| >150mg                        | 3                    | 198              | 156              | 4.52        | (1.83; 11.19)        | 0%             | 0              | PLA        |
| <b>NACH-ADRs</b>              | <b>14</b>            | <b>1257</b>      | <b>1185</b>      | <b>1.18</b> | <b>(0.74; 1.89)</b>  | <b>44%</b>     | <b>0.18</b>    | <b>INC</b> |
| <b>Gender</b>                 |                      |                  |                  |             |                      |                |                |            |
| Female                        | 3                    | 218              | 215              | 0.73        | (0.08; 6.78)         | 57%            | 0.07           | INC        |
| Male                          | 9                    | 858              | 791              | 1.05        | (0.61; 1.78)         | 29%            | 0.02           | INC        |
| Unknown                       | 2                    | 181              | 179              | 2.11        | (0.01; 444.01)       | 34%            | 0.12           | INC        |
| <b>Indication</b>             |                      |                  |                  |             |                      |                |                |            |
| Depression                    | 10                   | 840              | 768              | 1.07        | (0.57; 2.01)         | 53%            | 0.23           | INC        |
| Other                         | 4                    | 417              | 417              | 1.64        | (0.69; 3.93)         | 0%             | <.01           | INC        |
| <b>Mode of administration</b> |                      |                  |                  |             |                      |                |                |            |
| Capsules                      | 8                    | 610              | 574              | 1.11        | (0.54; 2.30)         | 54%            | 0.26           | INC        |
| Tablets                       | 3                    | 342              | 305              | 1.54        | (0.35; 6.75)         | 0%             | <.01           | INC        |
| Unknown                       | 2                    | 208              | 209              | 0.97        | (0.00; 1.06e+08)     | 72%            | 3.02           | INC        |
| Others                        | 1                    | 97               | 97               | 2.07        | (0.50; 8.51)         | NA             | NA             | INC        |
| <b>Mean daily dose</b>        |                      |                  |                  |             |                      |                |                |            |
| <100mg                        | 5                    | 503              | 474              | 1.33        | (0.63; 2.82)         | 0%             | <.01           | INC        |
| >=100mg & <=150mg             | 7                    | 624              | 622              | 1.06        | (0.45; 2.48)         | 63%            | 0.32           | INC        |
| >150mg                        | 2                    | 130              | 89               | 2.76        | (0.00; 4.46e+05)     | 24%            | 0.47           | INC        |
| <b>G-ADRs</b>                 | <b>21</b>            | <b>1777</b>      | <b>1660</b>      | <b>3.74</b> | <b>(2.69; 5.20)</b>  | <b>49%</b>     | <b>0.25</b>    | <b>PLA</b> |
| <b>Gender</b>                 |                      |                  |                  |             |                      |                |                |            |
| Female                        | 4                    | 266              | 262              | 5.51        | (1.79; 16.98)        | 37%            | 0.20           | PLA        |
| Male                          | 15                   | 1330             | 1219             | 3.27        | (2.19; 4.88)         | 51%            | 0.23           | PLA        |
| Unknown                       | 2                    | 181              | 179              | 6.47        | (2.41; 17.38)        | 0%             | 0.25           | PLA        |
| <b>Indication</b>             |                      |                  |                  |             |                      |                |                |            |
| Depression                    | 12                   | 967              | 900              | 4.02        | (2.48; 6.50)         | 54%            | 0.34           | PLA        |
| Other                         | 9                    | 810              | 760              | 3.47        | (2.02; 5.96)         | 47%            | 0.19           | PLA        |
| <b>Mode of administration</b> |                      |                  |                  |             |                      |                |                |            |
| Capsules                      | 12                   | 850              | 810              | 3.48        | (2.24; 5.40)         | 45%            | 0.25           | PLA        |
| Tablets                       | 5                    | 487              | 408              | 3.86        | (1.27; 11.67)        | 47%            | 0.26           | PLA        |

|         |   |     |     |      |               |     |      |     |
|---------|---|-----|-----|------|---------------|-----|------|-----|
| Others  | 2 | 232 | 233 | 2.41 | (0.20; 28.48) | 0%  | 0    | INC |
| Unknown | 2 | 208 | 209 | 9.50 | (2.03; 44.43) | 49% | 0.25 | PLA |

**Mean daily dose**

|                   |    |     |     |      |              |     |      |     |
|-------------------|----|-----|-----|------|--------------|-----|------|-----|
| <100mg            | 11 | 896 | 817 | 3.84 | (2.24; 6.58) | 51% | 0.24 | PLA |
| >=100mg & <=150mg | 8  | 677 | 677 | 3.70 | (1.75; 7.81) | 65% | 0.55 | PLA |
| >150mg            | 2  | 204 | 166 | 3.81 | (2.68; 5.42) | 0%  | 0    | PLA |

AMI = amitriptyline; PLA = placebo; OR = odds ratio; CI = confidence interval;  $I^2$  = heterogeneity;  $\tau^2$  = between study variance; ACH-ADRs = ADRs indicative for anticholinergic activities; NACH-ADRs = ADRs not indicative for anticholinergic activities; G-ADRs = general unspecific ADRs.

\*using scientific notation for values greater than 9,999. \*\*PLA = more frequent ADRs in amitriptyline group (95% CI not including "1"); AMI = more frequent ADRs in placebo group (95% CI not including "1"); INC: inconclusive, i.e., no difference in frequency of ADRs between placebo and amitriptyline groups (95% CI includes "1"). \*\*\*Sex ("male" vs. "female", when the majority of study participants were reported as such, and "unknown" when no sex was reported in the study)
